# Supplementary material
Source: publisher figshare collection journal article supplement (https://tandf.figshare.com/ndownloader/files/13747220)
Supplement: Supplementary file 1 [file 13747220]

***In silico* screening of deleterious SNPs and molecular dynamics simulation of disease associated mutations in gene responsible for OCA-6 disorder**

Rutash Kumar†a, Ankush Bansal†b, Rohit Shuklab, Tiratha Raj Singhb, Pramod Wasudeo Ramtekea, Satendra Singha, Budhayash Gautama*

aDepartment of Computational Biology & Bioinformatics, Jacob Instiute of Biotechnology & Bio-Engineering, Sam Higginbottom University of Agriculture, Technology and Sciences (SHUATS) Allahabad, 211007, U.P., India`

bDepartment of Biotechnology and Bioinformatics, Jaypee University of Information Technology, Waknaghat, Solan, 173215, H.P., India

†Authors contributed equally to this work.

***Corresponding author:**

Dr. Budhayash Gautam

Assistant Professor (Sr. Grade)

Department of Computational Biology & Bioinformatics

Jacob Institute of Biotechnology & Bio-Engineering

Sam Higginbottom University of Agriculture, Technology and Sciences (SHUATS)

Allahabad - 211007, U.P., India

**Email id:** budhayash.gautam@shiats.edu.in; budhayashgautam@gmail.com

**Phone:** +91-9451427316

**Supplementary Figures**

Supplementary Figure S1 Graphical representation of potential energy for native and mutant protein.

Supplementary Figure S2 Graphical representation of temperature for native and mutant protein.

Supplementary Figure S3 Graphical representation of Density for native and mutant protein.

Supplementary Figure S4 Graphical representation of Pressure for native and mutant protein.





**Supplementary Figure S1.** Graphical representation of potential energy for native and mutant protein .





**Supplementary Figure S2**. Graphical representation of temperature for native and mutant protein.





**Supplementary Figure S3**. Graphical representation of Density for native and mutant protein.





**Supplementary Figure S4**. Graphical representation of Pressure for native and mutant protein.
